# Supplementary material for: The BMP4-BMPR1A axis represses BRCA1 in mammary stem cells and contributes to tumor initiation.
Source: Research Square preprint supplement (doi:10.21203/rs.3.rs-8392937/v1), 2026-01-16
Supplement: Supplementary file 1 [file 50e39a17be7aa78c5417975e.docx]

**Supplementary figures legends**

**Supplementary Figure S1. (A)** Dunnet-Tukey-Kramer statistical test of the significativity of the BMPR1A mRNA expression differences between BLBL and the indicated PAM50 breast cancer subtypes in the TCGA cohort. **(B)** BMP4 mRNA expression in different breast cancer molecular subtypes, compared with healthy and peri-tumoral control tissues in the TCGA-Breast Cancer cohort. **(C)** Dunnet-Tukey-Kramer statistical test of the significativity of the BMP4 mRNA expression differences between BLBC and the indicated PAM50 breast cancer subtypes in the TCGA cohort. **(D)** ELISA quantification of soluble BMP4 in healthy mammary tissue and TNBC samples.

**Supplementary Figure S2. (A)** Representative high (left picture) and low (right picture) IHC staining of CK14 expression in BRCA1 wild-type TNBC. **(B)** Results of bivariate linear regression models of the correlation between BMPR1A protein and BRCA1 mRNA expression after adjustment for age, stage or CK14 membrane expression. **(C)** RT-qPCR analysis of BMP4 transcriptional expression in healthy BRCA1 mutated tissues, compared to healthy wild-type control tissues. **(D)** ELISA quantification of soluble BMP4 in healthy BRCA1 mutated tissues compared to healthy wild-type control tissues.

**Supplementary Figure S3. (A)** Representative Wright’s staining (upper row) or immunofluorescence (lower row) of CK18 (red), CK14 (green) and DNA (blue) in the indicated type of colonies obtained following an E-CFC assay in MCF10A. **(B)** Impact of a 72 hours BMP4 exposure of MCF10A on the total number of E-CFC compared to untreated cells. **(C)** Impact of a 72 hours shRNA-mediated BRCA1 knock-down in MCF10A on the total number of E-CFC compared to shLuc control cells. **(D)** Impact of a 72 hours BMP4 exposure of MCF10A on the number of mammosphere-forming cells compared to untreated cells. **(E)** Impact of a 72 hours shRNA-mediated BRCA1 knock-down in MCF10A on the number of mammosphere-forming cells compared to shLuc control cells.

**Supplementary Figure S4. (A)** Representative nuclei from an immunofluorescence detection of gH2Ax foci at the indicated time points before (P-i) or following a 2 Gy irradiation of MCF10A cells bearing a doxycycline-inducible shRNA directed against the Luciferase mRNA after 2 days in absence (-Dox) or presence (+Dox) of 400 ng/ml of doxycycline. DNA is stained in blue and gH2Ax in red. Representative nuclei 1 H post-irradiation with the anti-gH2AX antibody replaced by an isotype control are shown on the right panel. Pictures were taken with an Opera confocal microscope at 40x magnification and the scale bar represent 10 **m**m. **(B)**. As in (A) using an antibody directed against RAD51 (in red). **(C)**. As in (A) using an antibody directed against 53BP1 (in yellow). **(D)**. Quantification of the average number of gH2Ax foci per nucleus in the experiments illustrated in (A). Error bars show the standard deviation (n=5). *p<0.05, **p<0.01, ***p<0.001. **(E)**. As in (D) for the quantification of RAD51 foci illustrated in (B). **(F)**. As in (D) for quantification of 53BP1 foci illustrated in (C).

**Supplementary Figure S5. (A)** Representative nuclei from an immunofluorescence detection of gH2Ax foci at the indicated time points before (P-i) or following a 2 Gy irradiation of MCF10A cells bearing a doxycycline-inducible shRNA directed against the *BRCA1* mRNA after 2 days in absence (-Dox) or presence (+Dox) of 400 ng/ml of doxycycline. DNA is stained in blue and gH2Ax in red. Representative nuclei 1 H post-irradiation with the anti-gH2AX antibody replaced by an isotype control are shown on the right panel. Pictures were taken with an Opera confocal microscope at 40x magnification and the scale bar represent 10 **m**m. **(B)** As in (A) using an antibody directed against RAD51 (in red). **(C)**. As in (A) using an antibody directed against 53BP1 (in yellow). **(D)** Quantification of the average number of gH2Ax foci per nucleus in the experiments illustrated in (A. Error bars show the standard deviation (n=5). *p<0.05, **p<0.01, ***p<0.001. **(E)** As in (D) for the quantification of RAD51 foci illustrated in (B). **(F)** As in (D) for quantification of 53BP1 foci illustrated in (C).

**Supplementary Figure S6. (A)** Representative nuclei from an immunofluorescence detection of gH2Ax foci at the indicated time points before (P-i) or following a 2 Gy irradiation of MCF10A cells after 2 days in absence (-BMP4) or presence (+BMP4) of 10 ng/ml of BMP4. DNA is stained in blue and gH2Ax in red. Representative nuclei 1 H post-irradiation with the anti-gH2AX antibody replaced by an isotype control are shown on the right panel. Pictures were taken with an Opera confocal microscope at 40x magnification and the scale bar represent 10 **m**m. **(B)** As in (A) using an antibody directed against RAD51 (in red). **(C)** As in (A) using an antibody directed against 53BP1 (in yellow). **(D)** Left panel: representative pictures of western-blot detection of RAD51 before (P-i) or 1 hour following a 2 Gy irradiation of MCF10A cells after 2 days in absence (UT) or presence (BMP4) of 10 ng/ml of BMP4. GAPDH detection is used as a loading control. Right panel: Quantification of the RAD51/GAPDH ratio in the indicated conditions. Error bars show the standard deviation (n=5). *p<0.05.

**Supplementary Figure S7. (A)** Representative FACS plots of MCF10A-Fucci cells exposed or not to BMP4 (10ng/ml) and LDN-193189 (100 ng/ml) and treated or not with Olaparib (0.75 mM) for 7 days. **(B)** Representative pictures of a basic comet assay on MCF10A cells exposed or not to BMP4 (10ng/ml) or/and Olaparib (0.75 mM) after 7 days of treatment. **(C)** Quantification of the olive moment in the Comet assay shown in (B).
